# Supplementary material for: Sustainable green synthesis of Hedychium coronarium leaf extract-stabilized silver nanoparticles and their applications: colorimetric sensing of Sn2+ and Hg2+ and antifungal and antimicrobial properties
Source: Royal Society of Chemistry journal article supplement (doi:10.1039/d4na00443d), 2024-01-01
Supplement: d4na00443d1.pdf [file d4na00443d1.pdf]

### Electronic Supplementary Information

**Table: S1 The Comparison study of green synthesized Hc-AgNPs with reported AgNPs in different applications like metal ion sensing, Antifungal and Antibacterial activity**

| Nanoparticles | Reducing Agent (Extract)       | Test Pathogens | NPs used (concentration/ amount) | Method used  | Fungitoxicity Effect/ Antibacterial effect | Metal ions                                               | References                        |
|---------------|--------------------------------|----------------|----------------------------------|--------------|--------------------------------------------|----------------------------------------------------------|-----------------------------------|
| AgNPs & AuNPs | L- tyrosine                    | --             | --                               | Colorimetric | --                                         | Hg <sup>+2</sup> , Pb <sup>+2</sup> and Mn <sup>+2</sup> | Annadhasan et al., (2014) [1]     |
| AgNPs         | <i>Sonchus arvensis L</i>      | --             | --                               | Colorimetric | --                                         | Hg <sup>+2</sup> , Fe <sup>+3</sup>                      | Chandrakar et al., (2019) [19]    |
| AgNPs         | <i>Soap root plant</i>         | --             | --                               | Colorimetric | --                                         | Hg <sup>+2</sup>                                         | Farhadi et al., (2014) [39]       |
| AgNPs         | <i>Bauhinia variegata L</i>    | --             | --                               | Colorimetric | --                                         | Hg <sup>+2</sup> , Fe <sup>+3</sup>                      | Chandrakar et al., (2022) [47]    |
| AgNPs         | <i>Lycopersicon esculentum</i> | --             | --                               | Colorimetric | --                                         | Cr <sup>+3</sup>                                         | Mathew et al., (2018) [61]        |
| AgNPs         | <i>Cordia myxa leaf</i>        | --             | --                               | Colorimetric | --                                         | Fe <sup>+3</sup> , Hg <sup>+2</sup>                      | Majid Hashemi et al., (2018) [62] |
| AgNPs         | <i>Murraya koenigii</i>        | --             | --                               | Colorimetric | --                                         | Hg <sup>+2</sup>                                         | Hasana et al., (2017) [63]        |
| AgNPs         | <i>Carica papaya fruit</i>     | --             | --                               | Colorimetric | --                                         | Hg <sup>+2</sup>                                         | Sundaryono et al., (2017) [64]    |

|           |                                    |    |    |                            |    |                                     |                                    |
|-----------|------------------------------------|----|----|----------------------------|----|-------------------------------------|------------------------------------|
| AgNPs     | <i>Matricaria recutita</i>         | -- | -- | Colorimetric               | -- | Hg <sup>+2</sup>                    | Imran Uddin et al., (2017) [65]    |
| AgNPs     | <i>Aconitum violaceum</i>          | -- | -- | Colorimetric               | -- | Pb <sup>+2</sup>                    | Abdul Niaz et al., (2018) [66]     |
| AgNPs     | <i>Ficus Benjamina</i>             | -- | -- | Colorimetric               | -- | Zn <sup>+2</sup>                    | Israel López et al., (2019) [67]   |
| AgNPs     | <i>Green tea</i>                   | -- | -- | Colorimetric               | -- | Hg <sup>+2</sup>                    | Erturk et al., (2019) [68]         |
| AgNPs     | <i>Citrullus lanatus</i>           | -- | -- | Colorimetric               | -- | Ni <sup>+2</sup>                    | Rattanakit et al., (2019) [69]     |
| AgNPs     | <i>Bauhinia Variegeta leaves</i>   | -- | -- | Colorimetric               | -- | Fe <sup>+3</sup>                    | Deniz Uzunoglu et al., (2020) [70] |
| AgNPs     | <i>French lavender</i>             | -- | -- | Colorimetric               | -- | Hg <sup>+2</sup>                    | Demirezen et al., (2021) [71]      |
| AgNPs     | <i>Ziziphus mauritiana</i>         | -- | -- | Colorimetric               | -- | Hg <sup>+2</sup>                    | Memon et al. (2022) [72]           |
| AgCu-BNPs | <i>Folic and Ascorbic acid</i>     | -- | -- | Colorimetric& Fluorometric | -- | Hg <sup>+2</sup>                    | Ruyan Xie et al., (2021) [73]      |
| AgNPs     | <i>Piper Chaba stem</i>            | -- | -- | Colorimetric               | -- | Hg <sup>+2</sup>                    | Mahiuddin et al., (2023) [74]      |
| AgNPs     | <i>Mentha arvensis</i>             | -- | -- | Colorimetric               | -- | Al <sup>+3</sup>                    | Dinesh Kumar et al., (2018) [75]   |
| AgNPs     | <i>Trigonella foenum-graecum L</i> | -- | -- | Colorimetric               | -- | Hg <sup>+2</sup> , Fe <sup>+3</sup> | Sushila Singh et al., (2023) [76]  |
| AgNPs     | <i>Bistorta amplexicaulis root</i> | -- | -- | Colorimetric               | -- | Hg <sup>+2</sup> , Pb <sup>+2</sup> | Hai Xiong et al. (2023) [77]       |

|                             |                                           |                                                                                                                                                                              |                  |                            |                                                                  |                                         |                                       |
|-----------------------------|-------------------------------------------|------------------------------------------------------------------------------------------------------------------------------------------------------------------------------|------------------|----------------------------|------------------------------------------------------------------|-----------------------------------------|---------------------------------------|
| AgNPs                       | <i>Equisetum diffusum</i>                 | --                                                                                                                                                                           | --               | Colorimetric               | --                                                               | Hg <sup>+2</sup>                        | Hatem et al., (2023) [78]             |
| <b>Hc-AgNPs</b>             | <b><i>Hedychium coronarium leaves</i></b> | --                                                                                                                                                                           | --               | <b>Colorimetric</b>        | --                                                               | <b>Hg<sup>+2</sup>, Sn<sup>+2</sup></b> | <b>Present ork</b>                    |
| <b>Fungitoxicity Effect</b> |                                           |                                                                                                                                                                              |                  |                            |                                                                  |                                         |                                       |
| AgNPs                       | <i>Arthroderma fulvum (fungus)</i>        | <i>Fusarium oxysporum</i><br><i>Fusarium moniliforme</i><br><i>Fusarium solani</i><br><i>Aspergillus flavus</i><br><i>Aspergillus trrrus</i><br><i>Aspergillus fumigatus</i> | 0.125–4.00 µg/mL | Broth microdilution method | 80%                                                              | --                                      | Baiji Xue et al., (2016) [79]         |
| AgNPs                       | <i>Morus nigra leaves</i>                 | <i>Fusarium oxysporum</i><br><i>Aspergillus flavus</i><br><i>Aspergillus terrus</i><br><i>Fusarium verticillioides</i>                                                       | 1.6 %            | Agar well diffusion        | 41.66 ± 0.47 %<br>36.0 ± 0.41%<br>33.66 ± 0.63%<br>42.33 ± 0.63% | --                                      | Karam El-Din et al., (2017) [80]      |
| AgNPs                       | <i>Aspergillus Niger</i>                  | <i>Fusarium oxysporum</i><br><i>Aspergillus flavus</i>                                                                                                                       | 10 µg/mL         | Agar well diffusion        | 91.0 %<br>97.3 %                                                 | --                                      | Hayam Abdelkader et al., (2019) [81]  |
| AgNPs                       | <i>Brazilian greenpropolis</i>            | <i>Fusarium oxysporum</i>                                                                                                                                                    | 20.8 mg/l        | Agar well diffusion        | 50%                                                              | --                                      | Melyssa Negri et al., (2020) [82]     |
| AgNPs                       | <i>Amaranthus retroflexus leaves</i>      | <i>Fusarium oxysporum</i>                                                                                                                                                    | 400 µg/mL        | Agar well diffusion        | 53.83 ± 1.0mm                                                    | --                                      | Bahrami -Teimoori et al., (2017) [83] |

|                 |                                                                                  |                                                                                                                       |                                        |                                          |                                                                                                |           |                                               |
|-----------------|----------------------------------------------------------------------------------|-----------------------------------------------------------------------------------------------------------------------|----------------------------------------|------------------------------------------|------------------------------------------------------------------------------------------------|-----------|-----------------------------------------------|
| AgNPs           | <i>Cassia roxburghii</i><br><i>aqueous leaf</i>                                  | <i>Aspergillus niger</i><br><i>Aspergillus fumigatus</i><br><i>Aspergillus flavus</i>                                 | 10 µg (40µL)                           | Agar well diffusion<br>method            | 16.0 ± 2.00 mm<br>20.6 ± 1.52 mm<br>19.3 ± 1.52 mm                                             | --        | P. Balashanmugam<br>et al., (2016) [84]       |
| AgNPs           | <i>Cell-free extract</i><br><i>(CFE) of Bacillus</i><br><i>thuringiensis MAE</i> | <i>Aspergillus niger</i><br><i>Aspergillus terreus,</i><br><i>Aspergillus flavus,</i><br><i>Aspergillus fumigatus</i> | 500 µg /mL                             | Agar well diffusion<br>method            | 16 mm<br>20 mm<br>26 mm<br>19 mm                                                               | --        | Amr H. Hashem et<br>al., (2022) [85]          |
| AgNPs           | <i>Helvella leucopus</i>                                                         | <i>Penicillium chrysogenum</i><br><i>Aspergillus niger</i><br><i>Alternaria alternata</i>                             | 20mg/mL                                | Agar well diffusion<br>method            | 24.00 ±1.00 mm<br>20.33±0.57 mm<br>19.33±1.54 mm                                               | --        | Mehrajudin Talie et<br>al., (2023) [86]       |
| AgNPs           | <i>Coriander leaves</i>                                                          | <i>Rhizopus stolonifera</i><br><i>Fusarium solani</i>                                                                 | 1 mg/mL                                | Agar well diffusion<br>method            | 90.00 mm<br>34.08 ±2.04 mm                                                                     | --        | J. M. Moreno<br>Vargas et al.,<br>(2020) [87] |
| AgNPs           | <i>Juniperus procera</i>                                                         | <i>Fusarium</i><br><i>chlamydosporum</i><br><i>Aspergillus fumigatus</i>                                              | 100 mg/ml PE +<br>50 ppm AgNPs         | Poisoned-food<br>technique               | Leaf extract 50.55 %<br>Fruit extract 29.67 %<br>Leaf extract 59.06 %<br>Fruit extract 21.06 % | --        | Marwah M. Bakri<br>et al., (2020) [88]        |
| AgNPs           | <i>Borago officinalis</i>                                                        | <i>Candida albicans</i><br><i>Aspergillus flavus</i>                                                                  | 100 µg/ml                              | Disk diffusion<br>assay                  | 6 mm<br>not inhibited                                                                          | --        | Sanjay R. Kumavat<br>et al., (2021) [89]      |
| <b>Hc-AgNPs</b> | <b><i>Hedychium</i></b><br><b><i>coronarum leaves</i></b>                        | <b><i>Fusarium oxysporum</i></b><br><b><i>Aspergillus flavus</i></b>                                                  | <b>1.5 mg/ mL</b><br><b>1.5 mg/ mL</b> | <b>Poisoned-food</b><br><b>technique</b> | <b>57.93 ± 4.18 %</b><br><b>59.58 ± 3.68%</b>                                                  | <b>--</b> | <b>Present work</b>                           |
|                 |                                                                                  |                                                                                                                       |                                        |                                          |                                                                                                |           |                                               |

### Antibacterial Effect

|       |                                         |                                                                     |                          |                                   |                                      |    |                                                    |
|-------|-----------------------------------------|---------------------------------------------------------------------|--------------------------|-----------------------------------|--------------------------------------|----|----------------------------------------------------|
| AgNPs | <i>Hedera nepalensis</i>                | <i>Erwinia carotovora</i><br>subsp<br><i>Ralstonia solanacearum</i> | 1000 µg/ml               | Agar well diffusion method        | 15 mm<br>15 mm                       | -- | Zainab Bibi et al., (2023) [90]                    |
| AgNPs | <i>Spent Mushroom Substrate Extract</i> | <i>Ralstonia solanacearum</i>                                       | 30.0 mg/l                | Nutrient Broth (NB) liquid medium | 90%                                  | -- | Wenjing Mo et al., (2024) [91]                     |
| AgNPs | <i>Rubus fruticosus</i>                 | <i>Erwinia carotovora</i><br><i>Ralstonia solanacearum</i>          | 1000 mg mL <sup>-1</sup> | Nutrient Broth (NB) liquid medium | 90%<br>100%                          | -- | Adnan Khan et al., (2024) [92]                     |
| AgNPs | <i>Cottonseed oilcak</i>                | <i>Ralstonia solanacearum</i>                                       | 1–4 mM                   | Nutrient Broth (NB) liquid medium | 90%                                  | -- | Muthusamy Govarthan et al., (2016) [93]            |
| AgNPs | <i>P. peruviana</i>                     | <i>Ralstonia solanacearum</i><br><br><i>P.cartovora</i>             | 600 mg/L<br><br>600 mg/L | Agar well diffusion method        | 22.22 ± 1.46 %<br><br>29.26 ± 0.64 % | -- | Marwa A. Samy et al., (2019) [94]                  |
| AgNPs |                                         | <i>Erwinia carotovora</i> pv.<br><i>carotovora</i>                  | 150ppm                   | Agar well diffusion method        | (AgAE)13 mm,<br>(AgIB)12 mm          | -- | Aqleem Abbas et al., (2015) [95]                   |
| AgNPs | <i>Azadirachta indica</i>               | <i>Xanthomonas oryzae</i> pv                                        | 20µg/ml- 100 µl          | Agar well diffusion method        | 29.38±0.92 mm                        | -- | Mounil Mankad et al., (2015) [96]                  |
| AgNPs | <i>Euphorbia wallichii</i>              | <i>Xanthomonas axonopodis</i>                                       | 1000 µg/mL               | Nutrient Broth (NB) liquid medium | 98%                                  | -- | <a href="#">Muhammad Arif et al.</a> , (2022) [97] |

|          |                                    |                                                                                         |                      |                               |                                                                            |    |                                                      |
|----------|------------------------------------|-----------------------------------------------------------------------------------------|----------------------|-------------------------------|----------------------------------------------------------------------------|----|------------------------------------------------------|
| AgNPs    | Coffea arabica L                   | X. campestris<br>X.oryzae<br>X. vesicaloria                                             | 50 µl of 10<br>mg/ml | Agar well diffusion<br>method | 13.00±1.00 mm<br>11.66±0.57 mm<br>11.00±1.00 mm                            | -- | Nagendra Prasad <a href="#">et al.</a> , (2016) [98] |
| Hc-AgNPs | <i>Hedychium coronarium leaves</i> | <i>Xanthomonas oryzae</i><br><i>Ralstonia solanacearum</i><br><i>Erwinia carotovora</i> | <b>504 µg/ ml</b>    | Agar well diffusion<br>method | <b>16.33 ± 0.57 mm</b><br><b>15.33 ± 0.57 mm</b><br><b>14.33 ± 0.57 mm</b> | -- | <b>Present work</b>                                  |

## References

- [61]. A. Aravind, M. Sebastian and B. Mathew, Green synthesized unmodified silver nanoparticles as a multi-sensor for Cr(III) ions, *Environmental Science: Water Research & Technology*, 2018, **4**, 1531–1542.
- [62]. R. Azimpanah, Z. Solati and M. Hashemi, Green synthesis of silver nanoparticles and their applications as colorimetric probe for determination of Fe<sup>3+</sup> and Hg<sup>2+</sup> ions, *IET Nanobiotechnology*, 2018, **12**, 673–677.
- [63]. V. Kumar, D. K. Singh, S. Mohan, D. Bano, R. K. Gundampati and S. H. Hasan, Green synthesis of silver nanoparticle for the selective and sensitive colorimetric detection of mercury (II) ion, *Journal of Photochemistry and Photobiology B: Biology*, 2017, **168**, 67–77.
- [64]. M. Firdaus, S. Andriana, Elvinawati, W. Alwi, E. Swistoro, A. Ruyani and A. Sundaryono, Green synthesis of silver nanoparticles using Carica Papaya fruit extract under sunlight irradiation and their colorimetric detection of mercury ions, *Journal of Physics: Conference Series*, 2017, **817**, 012029.
- [65]. Uddin, K. Ahmad, A. A. Khan and M. A. Kazmi, Synthesis of silver nanoparticles using Matricaria recutita (Babunah) plant extract and its study as mercury ions sensor, *Sensing and Bio-Sensing Research*, 2017, **16**, 62–67.

- [66]. N. A. Khan, A. Niaz, M. I. Zaman, F. A. Khan, M. Nisar-ul-haq and M. Tariq, Sensitive and selective colorimetric detection of  $\text{Pb}^{2+}$  by silver nanoparticles synthesized from *Aconitum violaceum* plant leaf extract, *Materials Research Bulletin*, 2018, **102**, 330–336.
- [67]. C. Puente, I. Gómez, B. Kharisov and I. López, Selective colorimetric sensing of Zn (II) ions using green-synthesized silver nanoparticles: *Ficus benjamina* extract as reducing and stabilizing agent, *Materials Research Bulletin*, 2019, **112**, 1–8.
- [68]. A. S. Ertürk, Biosynthesis of Silver Nanoparticles Using *Epilobium parviflorum* Green Tea Extract: Analytical Applications to Colorimetric Detection of  $\text{Hg}^{2+}$  Ions and Reduction of Hazardous Organic Dyes, *Journal of Cluster Science*, 2019, **30**, 1363–1373.
- [69]. D. Khwannimit, N. Jaikrajang, S. Dokmaisrijan and P. Rattanakit, biologically green synthesis of silver nanoparticles from *Citrullus lanatus* extract with L-cysteine addition and investigation of colorimetric sensing of nickel (II) potential, *Materials Today: Proceedings*, 2019, **17**, 2028–2038.
- [70]. D. Uzunoğlu, M. Ergüt, C. G. Kodaman and A. Özer, Biosynthesized Silver Nanoparticles for Colorimetric Detection of  $\text{Fe}^{3+}$  Ions, *Arabian Journal for Science and Engineering*, DOI:10.1007/s13369-020-04760-8.
- [71]. D. Demirezen Yılmaz, D. Aksu Demirezen and H. Mihçioğur, Colorimetric detection of mercury ion using chlorophyll functionalized green silver nanoparticles in aqueous medium, *Surfaces and Interfaces*, 2021, **22**, 100840.
- [72]. R. Memon, A. A. Memon, Sirajuddin, A. Balouch, K. Memon, S. T. H. Sherazi, A. A. Chandio and R. Kumar, Ultrasensitive colorimetric detection of  $\text{Hg}^{2+}$  in aqueous media via green synthesis by *Ziziphus mauritiana* Leaf extract-based silver nanoparticles, *International Journal of Environmental Analytical Chemistry*, 2020, **102**, 7046–7061.

- [73]. J. Pang, R. Xie, S. Chua, Y. Zou, M. Tang, F. Zhang and F. Chai, Preparation of fluorescent bimetallic silver/copper nanoparticles and their utility of dual-mode fluorometric and colorimetric probe for  $\text{Hg}^{2+}$ , *Spectrochimica Acta Part A: Molecular and Biomolecular Spectroscopy*, 2021, **261**, 120035.
- [74]. P. Saha, Md. M. Billah, A. B. M. N. Islam, Md. A. Habib and Md. Mahiuddin, Green Synthesized Silver Nanoparticles: A Potential Antibacterial Agent, Antioxidant, and Colorimetric Nanoprobe for the Detection of  $\text{Hg}^{2+}$  Ions, *Global Challenges*, DOI:10.1002/gch2.202300072.
- [75]. R. Sharma, A. Dhillon and D. Kumar, Mentha-Stabilized Silver Nanoparticles for High-Performance Colorimetric Detection of Al (III) in Aqueous Systems, *Scientific Reports*, DOI:10.1038/s41598-018-23469-1.
- [76]. M. Moond, S. Singh, S. Sangwan, P. Devi, A. Beniwal, J. Rani, A. Kumari and S. Rani, Biosynthesis of Silver Nanoparticles Utilizing Leaf Extract of *Trigonella foenum-graecum* L. for Catalytic Dyes Degradation and Colorimetric Sensing of  $\text{Fe}^{3+}/\text{Hg}^{2+}$ , *Molecules*, 2023, **28**, 951.
- [77]. F. Ahmed, H. Kabir and H. Xiong, Dual Colorimetric Sensor for  $\text{Hg}^{2+}/\text{Pb}^{2+}$  and an Efficient Catalyst Based on Silver Nanoparticles Mediating by the Root Extract of *Bistorta amplexicaulis*, *Frontiers in Chemistry*, DOI:10.3389/fchem.2020.591958.
- [78]. A. Jabbar, A. Abbas, N. Assad, M. Naeem-ul-Hassan, H. A. Alhazmi, A. Najmi, K. Zoghebi, M. Al Bratty, A. Hanbashi and H. M. A. Amin, A highly selective  $\text{Hg}^{2+}$  colorimetric sensor and antimicrobial agent based on green synthesized silver nanoparticles using *Equisetum diffusum* extract, *RSC Advances*, 2023, **13**, 28666–28675.
- [79]. L. Wang, D. He, S. Gao, D. Wang, B. Xue and K. Yokoyama, Biosynthesis of silver nanoparticles by the fungus *Arthroderma fulvum* and its antifungal activity against genera of *Candida*, *Aspergillus* and *Fusarium*, *International Journal of Nanomedicine*, 2016, 1899.



- [80]. Green synthesis of silver nanoparticles using *Morus nigra* leave extract and evaluation their antifungal potency on phytopathogenic fungi, *Journal of Applied Pharmaceutical Science*, DOI:10.7324/japs.2017.70206.
- [81]. S. Al-Zubaidi, A. Al-Ayafi and H. Abdelkader, Biosynthesis, Characterization and Antifungal Activity of Silver Nanoparticles by *Aspergillus Niger* Isolate, *Journal of Nanotechnology Research*, DOI:10.26502/jnr.2688-8521002.
- [82]. B. Kischkel, P. F. de Castilho, K. M. de Oliveira, P. S. Rezende, M. L. Bruschi, T. I. Svidzinski and M. Negri, Silver nanoparticles stabilized with propolis show reduced toxicity and potential activity against fungal infections, *Future Microbiology*, 2020, **15**, 521–539.
- [83]. B. Bahrami-Teimoori, Y. Nikparast, M. Hojatianfar, M. Akhlaghi, R. Ghorbani and H. R. Pourianfar, Characterisation and antifungal activity of silver nanoparticles biologically synthesised by *Amaranthus retroflexus* leaf extract, *Journal of Experimental Nanoscience*, 2017, **12**, 129–139.
- [84]. P. Balashanmugam, M. D. Balakumaran, R. Murugan, K. Dhanapal and P. T. Kalaichelvan, Phytogetic synthesis of silver nanoparticles, optimization and evaluation of in vitro antifungal activity against human and plant pathogens, *Microbiological Research*, 2016, **192**, 52–64.
- [85]. A. H. Hashem, E. Saied, B. H. Amin, F. O. Alotibi, A. A. Al-Askar, A. A. Arishi, F. M. Elkady and M. A. Elbahasawy, Antifungal Activity of Biosynthesized Silver Nanoparticles (AgNPs) against *Aspergilli* Causing Aspergillosis: Ultrastructure Study, *Journal of Functional Biomaterials*, 2022, **13**, 242.
- [86]. J. M. Moreno-Vargas, L. M. Echeverry-Cardona, L. E. Moreno-Montoya and E. Restrepo-Parra, Evaluation of Antifungal Activity of Ag Nanoparticles Synthetized by Green Chemistry against *Fusarium solani* and *Rhizopus stolonifera*, *Nanomaterials*, 2023, **13**, 548.

- [87]. M. D. Talie, A. H. Wani, N. Ahmad, M. Y. Bhat and J. M. War, Green synthesis of silver nanoparticles (AgNPs) using helvella leucopus pers and their antimycotic activity against fungi causing fungal rot for apple. *Asian Journal of Pharmaceutical and Clinical Research*, 2020, 161–165.
- [88]. M. M. Bakri, M. A. El-Naggar, E. A. Helmy, M. S. Ashoor and T. M. Abdel Ghany, Efficacy of Juniperus procera Constituents with Silver Nanoparticles Against Aspergillus fumigatus and Fusarium chlamydosporum, *BioNanoScience*, 2020, **10**, 62–72.
- [89]. S. R. Kumavat and S. Mishra, Green synthesis of silver nanoparticles using Borago officinalis leaves extract and screening its antimicrobial and antifungal activity, *International Nano Letters*, 2021, **11**, 355–370.
- [90]. Z. Bibi, M. Ali, M. Abohashrh, I. Ahmad, H. Khan, M. Ali, F. Akbar, N. Ahmad, A. Iqbal, F. Ullah, Z. Ullah and T. Muhmood, Biologically Synthesized Silver Nanoparticles Efficiently Control Plant Pathogenic Bacteria-Erwinia carotovora and Ralstonia solanacearum, *Inorganics*, 2023, **11**, 309.
- [91]. W. Mo, C. Yao, H. Chen, A. K. Nassor, F. Gui, C. Hong, T. Huang, X. Guan, L. Xu and X. Pan, Biosynthesis of high antibacterial silver chloride nanoparticles against Ralstonia solanacearum using spent mushroom substrate extract, *Nano Express*, 2024, **5**, 015020.
- [92]. A. Khan, N. Ahmad, H. Fazal, M. Ali, F. Akbar, I. Khan, M. Tayyab, M. N. Uddin, N. Ahmad, M. A. Abdel-Maksoud, I. A. Saleh, N. Zomot, H. AbdElgawad, K. Rauf, B. Iqbal, M. C. M. Teixeira Filho, M. A. El-Tayeb and A. Jalal, Biogenic synthesis of silver nanoparticles using Rubus fruticosus extract and their antibacterial efficacy against Erwinia caratovora and Ralstonia solanacearum phytopathogens, *RSC Advances*, 2024, **14**, 5754–5763.
- [93]. M. Govarathanan, M. Cho, J.-H. Park, J.-S. Jang, Y.-J. Yi, S. Kamala-Kannan and B.-T. Oh, Cottonseed Oilcake Extract Mediated Green Synthesis of Silver Nanoparticles and Its Antibacterial and Cytotoxic Activity, *Journal of Nanomaterials*, 2016, **2016**, 1–6.

- [94]. M. A. Samy, M. A. Abbassy, E. E. Hafez, E. I. Rabea and D. G. Aseel, Biosynthesis and Characterization of Silver Nanoparticles Produced by Plant Extracts and Its Antimicrobial Activity, *South Asian Journal of Research in Microbiology*, 2019, 1–14.
- [95]. Antimicrobial activity of silver nanoparticles (AgNPs) against *Erwinia carotovora* pv. *carotovora* and *Alternaria solani*, *International Journal of Biosciences (IJB)*, 2015, **6**, 9–14.
- [96]. M. Mankad, G. Patil, D. Patel, P. Patel and A. Patel, Comparative studies of sunlight mediated green synthesis of silver nanoparticles from *Azadirachta indica* leaf extract and its antibacterial effect on *Xanthomonas oryzae* pv. *oryzae*, *Arabian Journal of Chemistry*, 2020, **13**, 2865–2872.
- [97]. M. Arif, R. Ullah, M. Ahmad, A. Ali, Z. Ullah, M. Ali, F. A. Al-Joufi, M. Zahoor and H. Sher, Green Synthesis of Silver Nanoparticles Using *Euphorbia wallichii* Leaf Extract: Its Antibacterial Action against Citrus Canker Causal Agent and Antioxidant Potential, *Molecules*, 2022, **27**, 3525.
- [98]. B. Syed, N. P. M.N., D. B.L., M. K. K., Y. S. and S. S., Synthesis of silver nanoparticles by endosymbiont *Pseudomonas fluorescens* CA 417 and their bactericidal activity, *Enzyme and Microbial Technology*, 2016, **95**, 128–136.
